# Supplementary material for: Risk of Blood Clots After COVID-19 Vaccination and Infection: A Risk-Benefit Analysis
Source: PubMed Central journal article supplement (PMC11177983; doi:10.21203/rs.3.rs-4378029/v1), 2024-06-07
Supplement: NIHPPrs4378029v1-supplement-1.pdf [file NIHPPrs4378029v1-supplement-1.pdf]

## Supplementary Files

This is a list of supplementary files associated with this preprint. Click to download.

- [Appendix.docx](#)
